# Supplementary material for: Catenation of carbon in LaC2 predicted under high pressure
Source: Royal Society of Chemistry journal article supplement (doi:10.1039/c6cp01484d), 2016-01-01
Supplement: c6cp01484d1.pdf [file c6cp01484d1.pdf]

Figures for phonon dispersions and the isosurfaces of electron localization function (ELF):

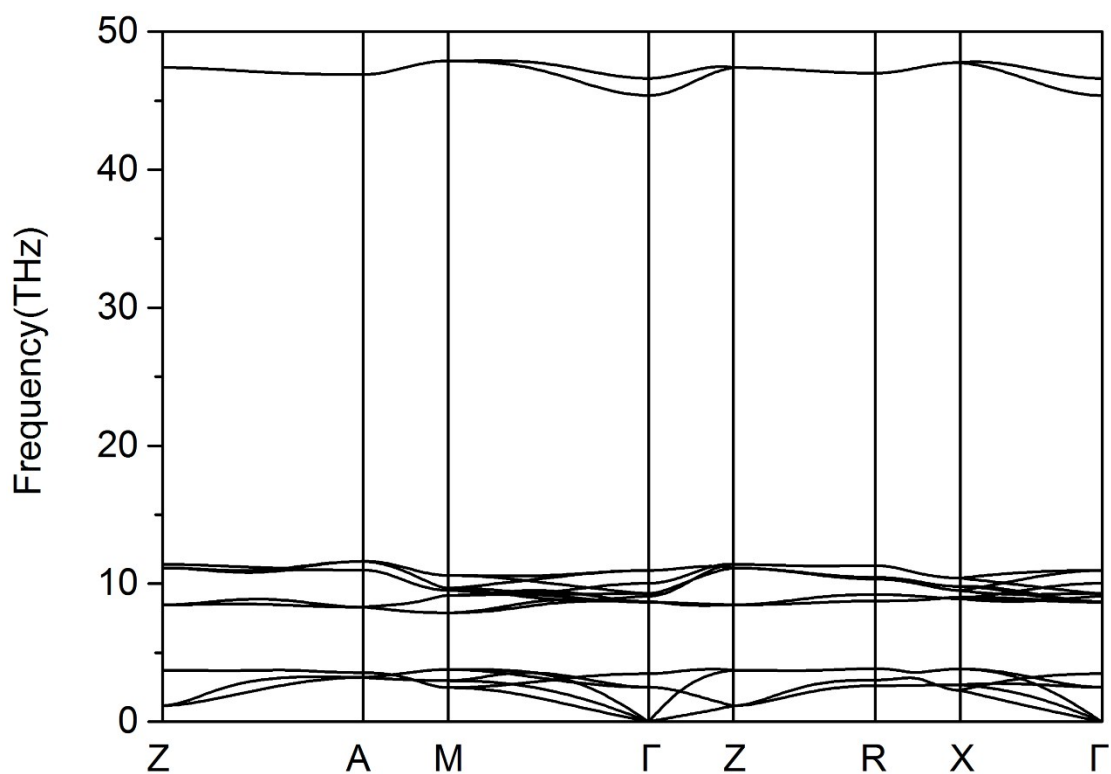

**Fig. S1** Phonon dispersions of the  $I4/mmm$  structure ( $\alpha$  phase) at ambient pressure.

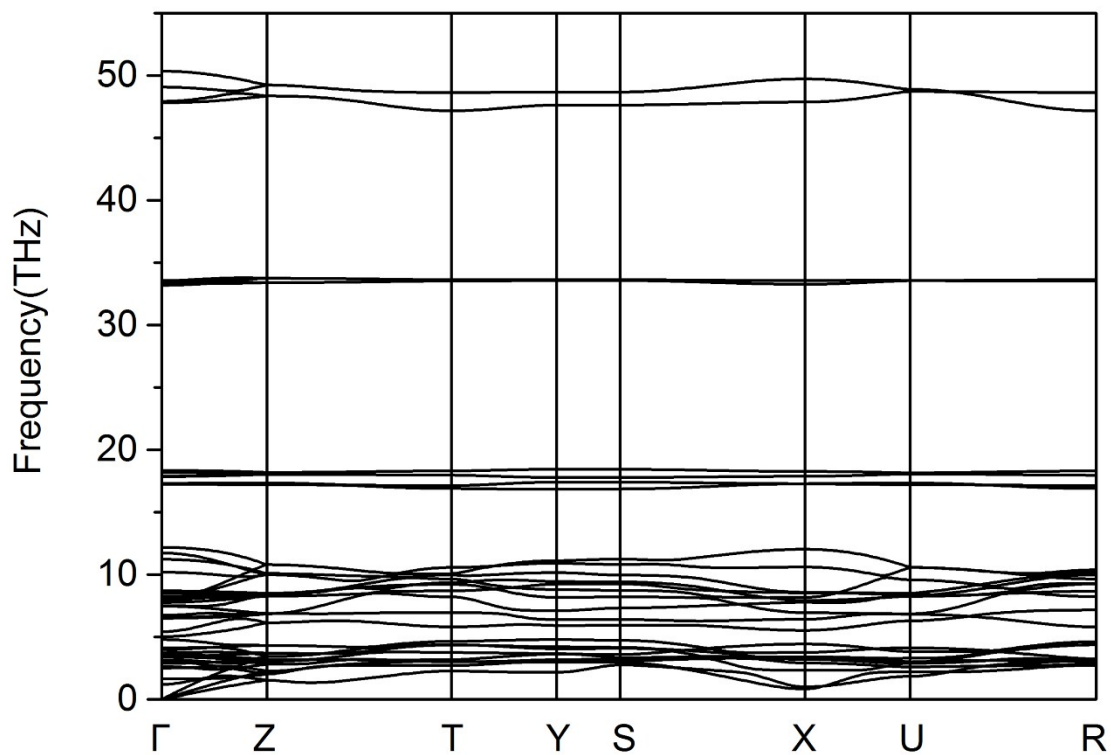

**Fig. S2** Phonon dispersions of the  $Immm$  structure ( $\alpha'$  phase) at ambient pressure.

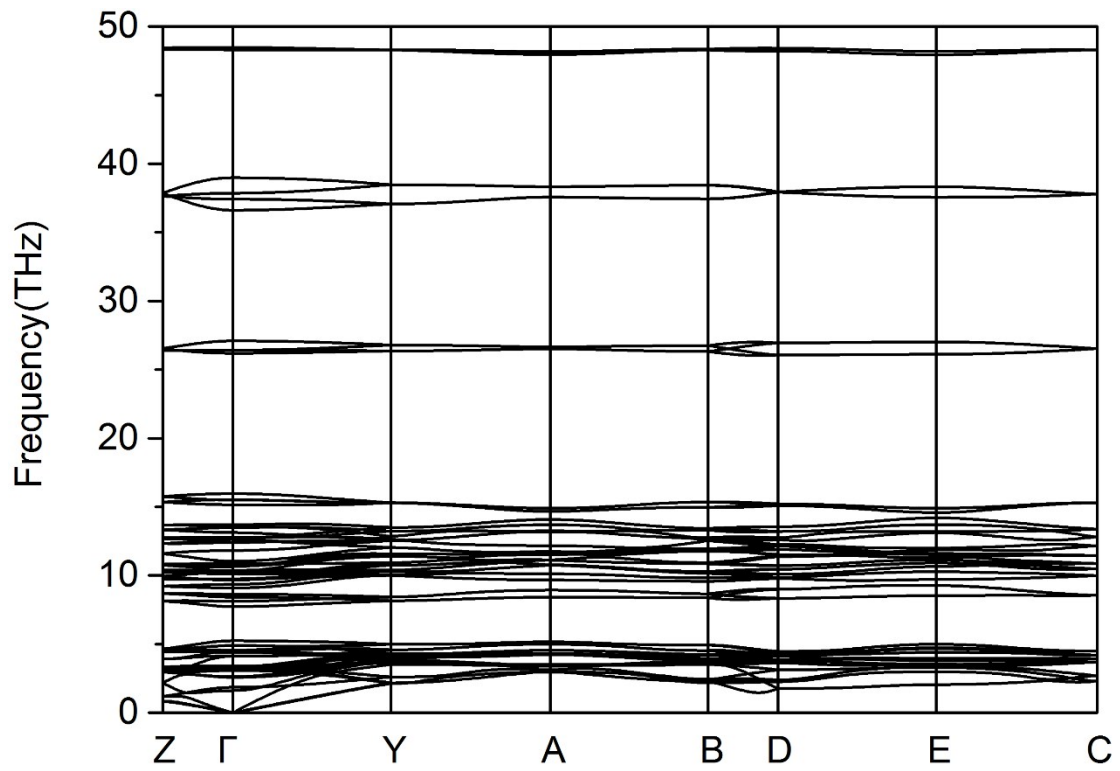

**Fig. S3** Phonon dispersions of the  $C2/c$  structure at 10.0 GPa.

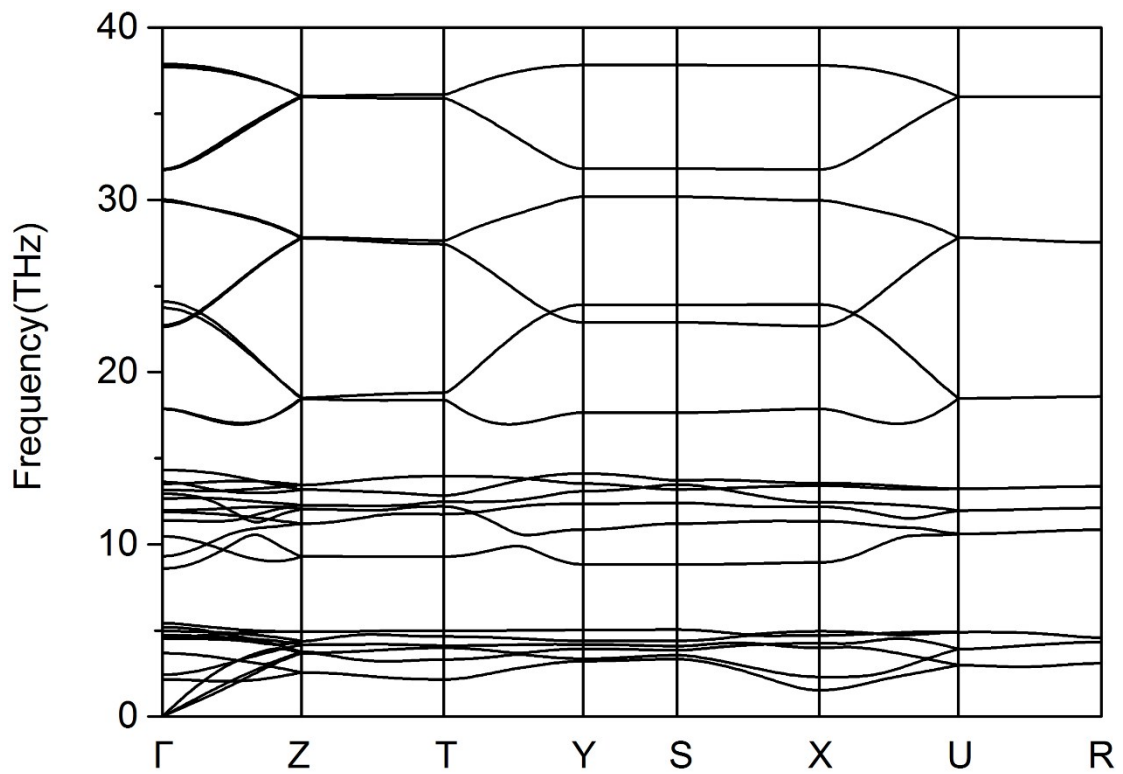

**Fig. S4** Phonon dispersions of the  $Pnma$  structure at 20.0 GPa.

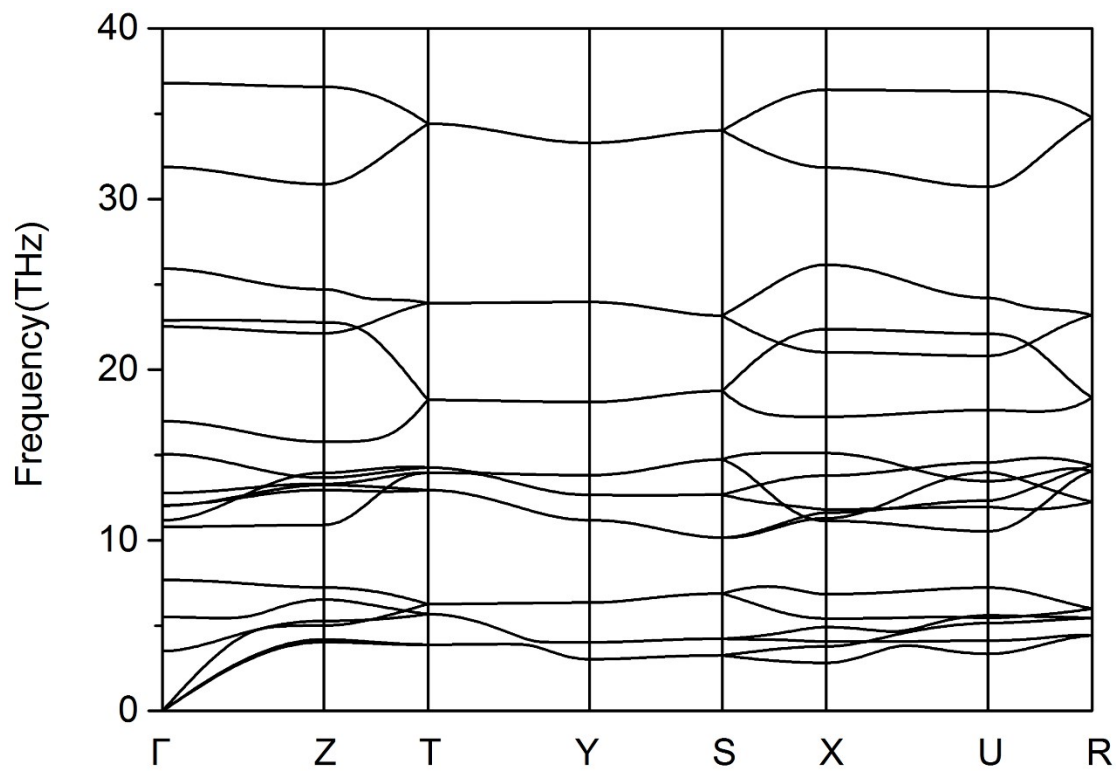

**Fig. S5** Phonon dispersions of the *Pmma* structure at 30.0 GPa.

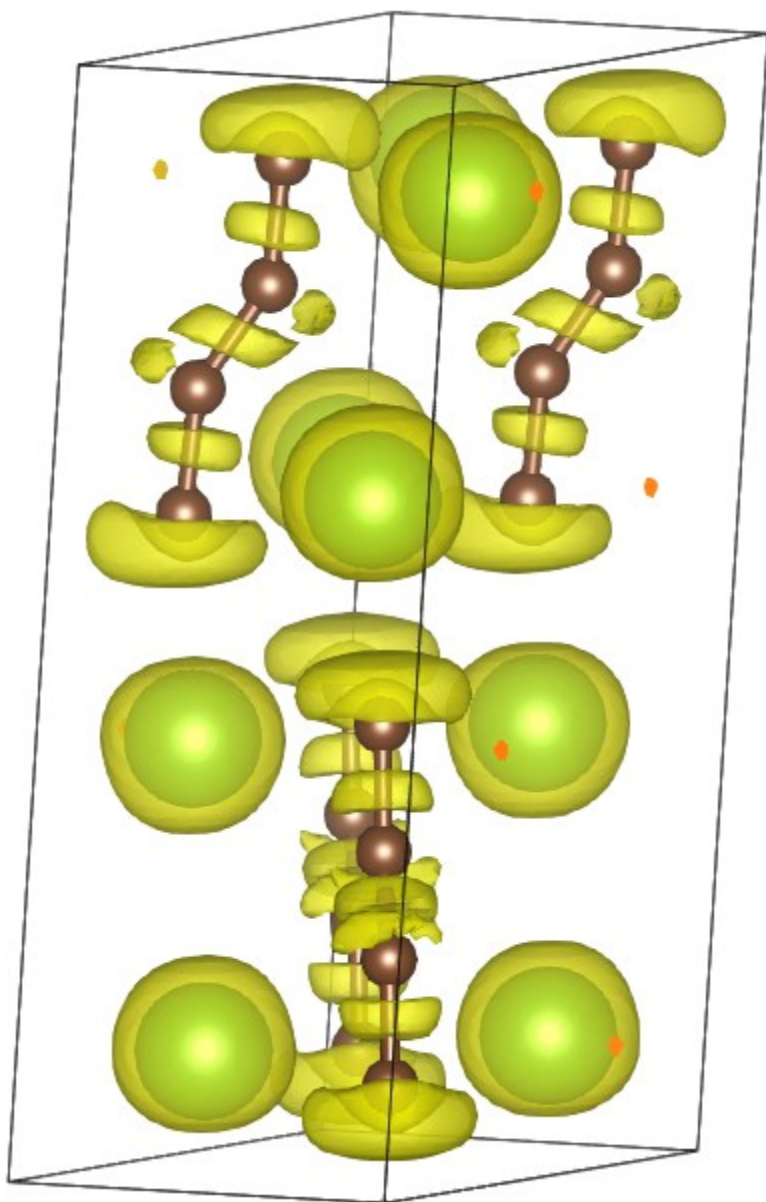

**Fig. S6** Isosurfaces of electron localization function (ELF) with the value of 0.78 for the  $C2/c$  structure at 10.0 GPa.

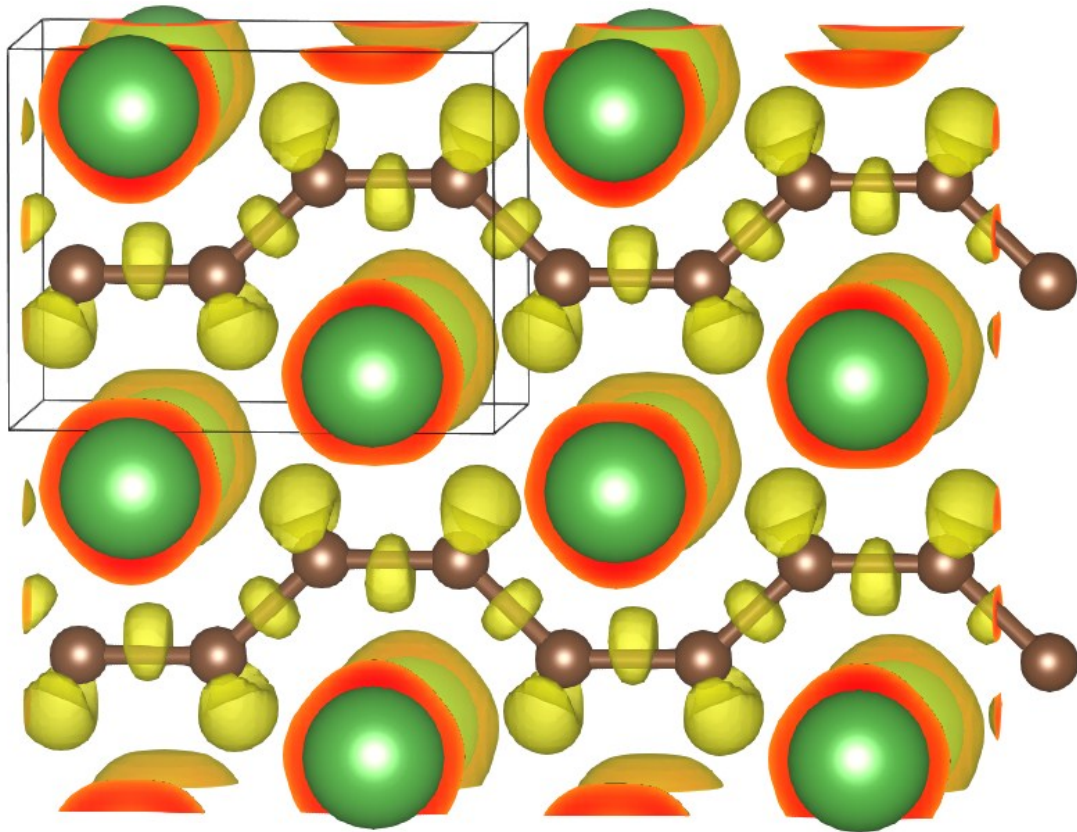

**Fig. S7** Isosurfaces of electron localization function (ELF) with the value of 0.78 for the *Pmma* structure at 30.0 GPa.
